# Supplementary material for: A longitudinal study of the faecal microbiome and metabolome of periparturient mares
Source: PeerJ. 2019 Apr 3;7:e6687. doi: 10.7717/peerj.6687 (PMC6451438; doi:10.7717/peerj.6687)
Supplement: Supplemental Information 3 — A list of OTUs that were either upregulated or downregulated post-foaling. [file peerj-07-6687-s003.xlsx]

## Sheet: Supplemental Table 3
Table S3: A list of OTUs that were either upregulated or downregulated post-foaling.
a. Upregulated OTUs
OUT	Mean count	log2FoldChange	Fold_Change	Standard error	Wald statistic	Wald test p-value	BH adjusted p-values	Phylum	Class	Order	Family	Genus	Species
New.ReferenceOTU1152	4.52842	3.08336	8.47587	0.57114	5.39861	6.71606e-08	0.000184826	Bacteroidetes	Bacteroidia	Bacteroidales	Unassigned	Unassigned	Unassigned
New.ReferenceOTU686	3.00609	2.97512	7.8632	0.75268	3.9527	7.72747e-05	0.0106709	Firmicutes	Clostridia	Clostridiales	Ruminococcaceae	Oscillospira	Unassigned
New.ReferenceOTU11766	3.00235	2.9746	7.86039	0.662818	4.48781	7.19591e-06	0.00330052	Firmicutes	Clostridia	Clostridiales	Ruminococcaceae	Unassigned	Unassigned
New.ReferenceOTU3506	1.40459	2.87883	7.35553	0.705804	4.0788	4.52695e-05	0.0081702	Firmicutes	Clostridia	Clostridiales	Unassigned	Unassigned	Unassigned
New.ReferenceOTU2781	6.06385	2.82367	7.0796	0.590961	4.7781	1.76962e-06	0.00133416	Firmicutes	Clostridia	Clostridiales	Ruminococcaceae	Unassigned	Unassigned
New.ReferenceOTU3056	2.54333	2.65613	6.3034	0.626534	4.23941	2.24112e-05	0.00616756	Firmicutes	Clostridia	Clostridiales	Ruminococcaceae	Unassigned	Unassigned
New.ReferenceOTU512	2.45986	2.61733	6.13613	0.75571	3.4634	0.000533388	0.0407746	Firmicutes	Clostridia	Clostridiales	Ruminococcaceae	Unassigned	Unassigned
New.ReferenceOTU14918	1.38572	2.47425	5.55678	0.716473	3.45337	0.000553625	0.0411777	Firmicutes	Clostridia	Clostridiales	Unassigned	Unassigned	Unassigned
New.ReferenceOTU1086	2.02682	2.40572	5.29901	0.728933	3.30033	0.000965697	0.0565446	Firmicutes	Clostridia	Clostridiales	Ruminococcaceae	Unassigned	Unassigned
New.ReferenceOTU3401	1.56232	2.35873	5.1292	0.714415	3.30163	0.000961238	0.0565446	Firmicutes	Clostridia	Clostridiales	Ruminococcaceae	Unassigned	Unassigned
New.ReferenceOTU1955	1.57725	2.3583	5.12767	0.702734	3.3559	0.000791078	0.0518344	Firmicutes	Clostridia	Clostridiales	Ruminococcaceae	Unassigned	Unassigned
110250	6.03286	2.35326	5.10977	0.738844	3.18506	0.00144726	0.0670871	Firmicutes	Clostridia	Clostridiales	Ruminococcaceae	Unassigned	Unassigned
New.ReferenceOTU869	3.72821	2.28534	4.87478	0.557532	4.09903	4.14893e-05	0.0081556	Firmicutes	Clostridia	Clostridiales	Ruminococcaceae	Unassigned	Unassigned
New.ReferenceOTU8457	2.05873	2.21209	4.63345	0.665495	3.32397	0.000887457	0.0550141	Fibrobacteres	Fibrobacteria	Fibrobacterales	Fibrobacteraceae	Fibrobacter	succinogenes
New.ReferenceOTU3754	1.48014	2.18375	4.54334	0.682082	3.2016	0.00136669	0.0654641	Firmicutes	Clostridia	Clostridiales	Ruminococcaceae	Unassigned	Unassigned
New.ReferenceOTU354	6.27429	2.18268	4.53996	0.603992	3.61375	0.000301797	0.028658	Bacteroidetes	Bacteroidia	Bacteroidales	Unassigned	Unassigned	Unassigned
New.ReferenceOTU258	14.2744	2.16744	4.49225	0.524684	4.13094	3.61287e-05	0.00800436	Firmicutes	Clostridia	Clostridiales	Ruminococcaceae	Unassigned	Unassigned
New.ReferenceOTU1021	1.40459	2.16384	4.48107	0.63998	3.38111	0.000721929	0.0489323	Firmicutes	Clostridia	Clostridiales	Ruminococcaceae	Unassigned	Unassigned
287493	4.49169	2.12305	4.35615	0.675607	3.14244	0.00167545	0.0742461	Bacteroidetes	Bacteroidia	Bacteroidales	Unassigned	Unassigned	Unassigned
New.ReferenceOTU453	10.3284	2.11097	4.31982	0.447769	4.71442	2.42398e-06	0.00133416	Firmicutes	Clostridia	Clostridiales	Ruminococcaceae	Oscillospira	Unassigned
New.ReferenceOTU111	16.7123	2.08717	4.24915	0.690444	3.02294	0.00250328	0.0943704	Firmicutes	Clostridia	Clostridiales	Ruminococcaceae	Ruminococcus	Unassigned
183715	2.25178	2.08712	4.24899	0.60191	3.46749	0.000525335	0.0407746	Firmicutes	Clostridia	Clostridiales	Ruminococcaceae	Oscillospira	Unassigned
New.ReferenceOTU139	9.04543	2.07982	4.22754	0.686518	3.02952	0.00244945	0.0936235	Bacteroidetes	Bacteroidia	Bacteroidales	Unassigned	Unassigned	Unassigned
New.ReferenceOTU149	22.2533	2.06119	4.17331	0.610104	3.37843	0.000729006	0.0489323	Bacteroidetes	Bacteroidia	Bacteroidales	Unassigned	Unassigned	Unassigned
New.ReferenceOTU35	83.037	2.04	4.11247	0.625111	3.26343	0.00110072	0.0615282	Firmicutes	Clostridia	Clostridiales	Ruminococcaceae	Unassigned	Unassigned
New.ReferenceOTU1535	2.54194	1.99087	3.97477	0.54105	3.67965	0.000233558	0.0257101	Firmicutes	Clostridia	Clostridiales	Ruminococcaceae	Oscillospira	Unassigned
New.ReferenceOTU1560	26.2432	1.98908	3.96982	0.482731	4.12046	3.78113e-05	0.00800436	Firmicutes	Clostridia	Clostridiales	Ruminococcaceae	Unassigned	Unassigned
New.ReferenceOTU6548	5.886	1.96961	3.91661	0.49988	3.94016	8.14277e-05	0.0106709	Firmicutes	Clostridia	Clostridiales	Ruminococcaceae	Unassigned	Unassigned
New.ReferenceOTU28	36.2535	1.96893	3.91478	0.607669	3.24014	0.00119472	0.0622198	Firmicutes	Clostridia	Clostridiales	Ruminococcaceae	Unassigned	Unassigned
New.ReferenceOTU478	3.46927	1.95006	3.86392	0.609611	3.19887	0.00137969	0.0654641	Bacteroidetes	Bacteroidia	Bacteroidales	Prevotellaceae	Prevotella	Unassigned
New.ReferenceOTU1028	2.40292	1.93202	3.8159	0.596434	3.23929	0.00119827	0.0622198	Bacteroidetes	Bacteroidia	Bacteroidales	[Paraprevotellaceae]	CF231	Unassigned
New.ReferenceOTU3411	7.74354	1.91681	3.77587	0.637558	3.00649	0.00264285	0.0956991	Fibrobacteres	Fibrobacteria	Fibrobacterales	Fibrobacteraceae	Fibrobacter	succinogenes
New.ReferenceOTU8441	2.75887	1.85201	3.61002	0.578196	3.20308	0.00135967	0.0654641	Firmicutes	Clostridia	Clostridiales	Ruminococcaceae	Oscillospira	Unassigned
New.ReferenceOTU20	206.79	1.81182	3.51085	0.608939	2.97537	0.00292635	0.0994235	Fibrobacteres	Fibrobacteria	Fibrobacterales	Fibrobacteraceae	Fibrobacter	succinogenes
New.ReferenceOTU1722	2.30759	1.77838	3.43041	0.597653	2.9756	0.00292413	0.0994235	Firmicutes	Clostridia	Clostridiales	Ruminococcaceae	Oscillospira	Unassigned
294993	9.05703	1.75943	3.38564	0.486893	3.61359	0.000301992	0.028658	Firmicutes	Clostridia	Clostridiales	Ruminococcaceae	Oscillospira	Unassigned
306020	7.59471	1.63985	3.11632	0.407095	4.02816	5.62148e-05	0.00864213	Firmicutes	Clostridia	Clostridiales	Ruminococcaceae	Unassigned	Unassigned
294363	216.957	1.62495	3.08432	0.342736	4.74113	2.12529e-06	0.00133416	Firmicutes	Clostridia	Clostridiales	Ruminococcaceae	Oscillospira	Unassigned
New.ReferenceOTU2695	5.2235	1.59405	3.01895	0.533135	2.98995	0.00279027	0.0972003	Firmicutes	Clostridia	Clostridiales	Ruminococcaceae	Unassigned	Unassigned
New.ReferenceOTU178	14.8928	1.54083	2.90962	0.439641	3.50475	0.000457036	0.0369931	Firmicutes	Clostridia	Clostridiales	Ruminococcaceae	Unassigned	Unassigned
New.ReferenceOTU125	15.1712	1.52417	2.87621	0.390437	3.90375	9.47154e-05	0.011848	Firmicutes	Clostridia	Clostridiales	Ruminococcaceae	Unassigned	Unassigned
New.ReferenceOTU218	21.4288	1.45943	2.75001	0.42588	3.42687	0.000610587	0.0442193	Firmicutes	Clostridia	Clostridiales	Ruminococcaceae	Oscillospira	Unassigned
New.ReferenceOTU14990	17.1653	1.45665	2.7447	0.400936	3.63312	0.000280012	0.0285404	Firmicutes	Clostridia	Clostridiales	Ruminococcaceae	Unassigned	Unassigned
351927	7.22103	1.45478	2.74114	0.429438	3.38763	0.000705001	0.0489323	Firmicutes	Clostridia	Clostridiales	Ruminococcaceae	Oscillospira	Unassigned
4375889	15.9457	1.40449	2.64724	0.434549	3.23207	0.00122898	0.0622845	Firmicutes	Clostridia	Clostridiales	Ruminococcaceae	Oscillospira	Unassigned
New.ReferenceOTU184	11.6739	1.379	2.60088	0.387458	3.55909	0.000372146	0.0320046	Firmicutes	Clostridia	Clostridiales	Ruminococcaceae	Oscillospira	Unassigned
New.ReferenceOTU944	14.7668	1.3456	2.54135	0.431337	3.1196	0.00181099	0.0766747	Bacteroidetes	Bacteroidia	Bacteroidales	Unassigned	Unassigned	Unassigned
New.ReferenceOTU236	36.0145	1.26257	2.39922	0.353064	3.57603	0.000348857	0.0309695	Firmicutes	Clostridia	Clostridiales	Ruminococcaceae	Oscillospira	Unassigned
New.ReferenceOTU460	11.2405	1.26141	2.3973	0.386119	3.26689	0.00108736	0.0615282	Bacteroidetes	Bacteroidia	Bacteroidales	Unassigned	Unassigned	Unassigned
New.ReferenceOTU206	15.1636	1.25894	2.3932	0.411194	3.06167	0.00220109	0.0853154	Bacteroidetes	Bacteroidia	Bacteroidales	Unassigned	Unassigned	Unassigned
291854	9.20759	1.23602	2.35548	0.372274	3.32019	0.000899576	0.0550141	Firmicutes	Clostridia	Clostridiales	Ruminococcaceae	Unassigned	Unassigned
New.ReferenceOTU92	59.0887	1.21431	2.3203	0.286288	4.24157	2.21965e-05	0.00616756	Firmicutes	Clostridia	Clostridiales	Ruminococcaceae	Oscillospira	Unassigned
292243	33.9923	1.10702	2.154	0.340262	3.25342	0.00114024	0.0615282	Firmicutes	Clostridia	Clostridiales	Ruminococcaceae	Oscillospira	Unassigned
298457	37.9214	1.05492	2.0776	0.342163	3.08309	0.0020486	0.0831907	Firmicutes	Clostridia	Clostridiales	Ruminococcaceae	Oscillospira	Unassigned
b. Downregulated OTUs
New.ReferenceOTU1487	4.83832	-1.32986	0.397806	0.441619	-3.01133	0.00260104	0.0954407	Bacteroidetes	Bacteroidia	Bacteroidales	Unassigned	Unassigned	Unassigned
New.ReferenceOTU799	4.37626	-1.47937	0.358645	0.4035	-3.66635	0.000246036	0.026042	Cyanobacteria	4C0d-2	YS2	Unassigned	Unassigned	Unassigned
New.ReferenceOTU30	29.9699	-1.57399	0.335877	0.390873	-4.02686	5.65255e-05	0.00864213	Spirochaetes	Spirochaetes	Spirochaetales	Spirochaetaceae	Treponema	Unassigned
New.ReferenceOTU3013	1.53394	-1.69826	0.308157	0.566494	-2.99785	0.00271888	0.0971735	Firmicutes	Clostridia	Clostridiales	Ruminococcaceae	Unassigned	Unassigned
New.ReferenceOTU836	5.57187	-1.6985	0.308107	0.526109	-3.22841	0.00124478	0.0622845	Spirochaetes	Spirochaetes	Spirochaetales	Spirochaetaceae	Treponema	Unassigned
New.ReferenceOTU297	9.9221	-1.72163	0.303206	0.54187	-3.1772	0.00148703	0.0670871	Bacteroidetes	Bacteroidia	Bacteroidales	Unassigned	Unassigned	Unassigned
New.ReferenceOTU264	12.7792	-1.73294	0.300838	0.439745	-3.94079	8.12144e-05	0.0106709	Spirochaetes	Spirochaetes	Spirochaetales	Spirochaetaceae	Treponema	Unassigned
New.ReferenceOTU5775	4.09933	-1.85119	0.277164	0.590272	-3.13616	0.00171175	0.0742461	Firmicutes	Clostridia	Clostridiales	Ruminococcaceae	Unassigned	Unassigned
New.ReferenceOTU1834	2.43153	-1.92224	0.263844	0.642629	-2.99122	0.00277868	0.0972003	Firmicutes	Erysipelotrichi	Erysipelotrichales	Erysipelotrichaceae	RFN20	Unassigned
New.ReferenceOTU10764	3.77272	-1.92578	0.263198	0.548552	-3.51066	0.000446993	0.0369931	Bacteroidetes	Bacteroidia	Bacteroidales	Prevotellaceae	Prevotella	Unassigned
New.ReferenceOTU1331	1.78121	-1.92831	0.262737	0.627543	-3.0728	0.00212063	0.083371	Firmicutes	Clostridia	Clostridiales	Lachnospiraceae	Unassigned	Unassigned
New.ReferenceOTU5563	1.73695	-1.93408	0.261688	0.626004	-3.08956	0.00200451	0.0831907	Firmicutes	Clostridia	Clostridiales	Unassigned	Unassigned	Unassigned
New.ReferenceOTU707	4.03999	-1.99679	0.250557	0.557961	-3.57873	0.000345268	0.0309695	Elusimicrobia	Endomicrobia	Unassigned	Unassigned	Unassigned	Unassigned
New.ReferenceOTU970	5.44951	-2.01002	0.24827	0.457056	-4.39775	1.0938e-05	0.0043002	Cyanobacteria	4C0d-2	YS2	Unassigned	Unassigned	Unassigned
New.ReferenceOTU743	2.69623	-2.01138	0.248036	0.66636	-3.01846	0.00254065	0.0944846	Firmicutes	Clostridia	Clostridiales	Ruminococcaceae	Unassigned	Unassigned
New.ReferenceOTU1875	1.74424	-2.01262	0.247823	0.618123	-3.25601	0.0011299	0.0615282	Firmicutes	Bacilli	Bacillales	Unassigned	Unassigned	Unassigned
New.ReferenceOTU162	11.3109	-2.05432	0.240762	0.646137	-3.17939	0.00147586	0.0670871	Spirochaetes	Spirochaetes	Spirochaetales	Spirochaetaceae	Treponema	Unassigned
New.ReferenceOTU2208	1.97523	-2.09995	0.233267	0.68134	-3.08208	0.00205558	0.0831907	Spirochaetes	Spirochaetes	Spirochaetales	Spirochaetaceae	Treponema	Unassigned
316092	16.78	-2.19017	0.219126	0.567685	-3.85807	0.000114288	0.0136748	Bacteroidetes	Bacteroidia	Bacteroidales	Prevotellaceae	Prevotella	Unassigned
New.ReferenceOTU300	18.4352	-2.26098	0.20863	0.734769	-3.07713	0.00209002	0.0833587	Firmicutes	Clostridia	Clostridiales	Lachnospiraceae	Unassigned	Unassigned
New.ReferenceOTU5653	5.96539	-2.32657	0.199358	0.69756	-3.33529	0.000852093	0.054534	Firmicutes	Clostridia	Clostridiales	Ruminococcaceae	Ruminococcus	Unassigned
New.ReferenceOTU810	31.6202	-2.35166	0.195921	0.578145	-4.06759	4.75012e-05	0.0081702	Bacteroidetes	Bacteroidia	Bacteroidales	Prevotellaceae	Prevotella	Unassigned
3244896	23.3327	-2.42007	0.186848	0.772291	-3.13362	0.00172665	0.0742461	Firmicutes	Bacilli	Lactobacillales	Streptococcaceae	Streptococcus	luteciae
New.ReferenceOTU709	6.85612	-2.66307	0.157884	0.700637	-3.80092	0.000144158	0.0165301	Spirochaetes	Spirochaetes	Spirochaetales	Spirochaetaceae	Treponema	Unassigned
New.ReferenceOTU1319	5.88135	-2.9042	0.133583	0.666553	-4.35704	1.31832e-05	0.00453503	Bacteroidetes	Bacteroidia	Bacteroidales	[Paraprevotellaceae]	YRC22	Unassigned
New.ReferenceOTU11141	4.73451	-2.97859	0.126869	0.625397	-4.76271	1.91006e-06	0.00133416	Bacteroidetes	Bacteroidia	Bacteroidales	Prevotellaceae	Unassigned	Unassigned
New.ReferenceOTU1290	4.71317	-3.08329	0.117988	0.735125	-4.19424	2.73786e-05	0.00684962	Elusimicrobia	Endomicrobia	Unassigned	Unassigned	Unassigned	Unassigned
