# Supplementary material for: A longitudinal study of the faecal microbiome and metabolome of periparturient mares
Source: PeerJ journal article supplement (doi:10.7717/peerj.6687), 2019-04-03

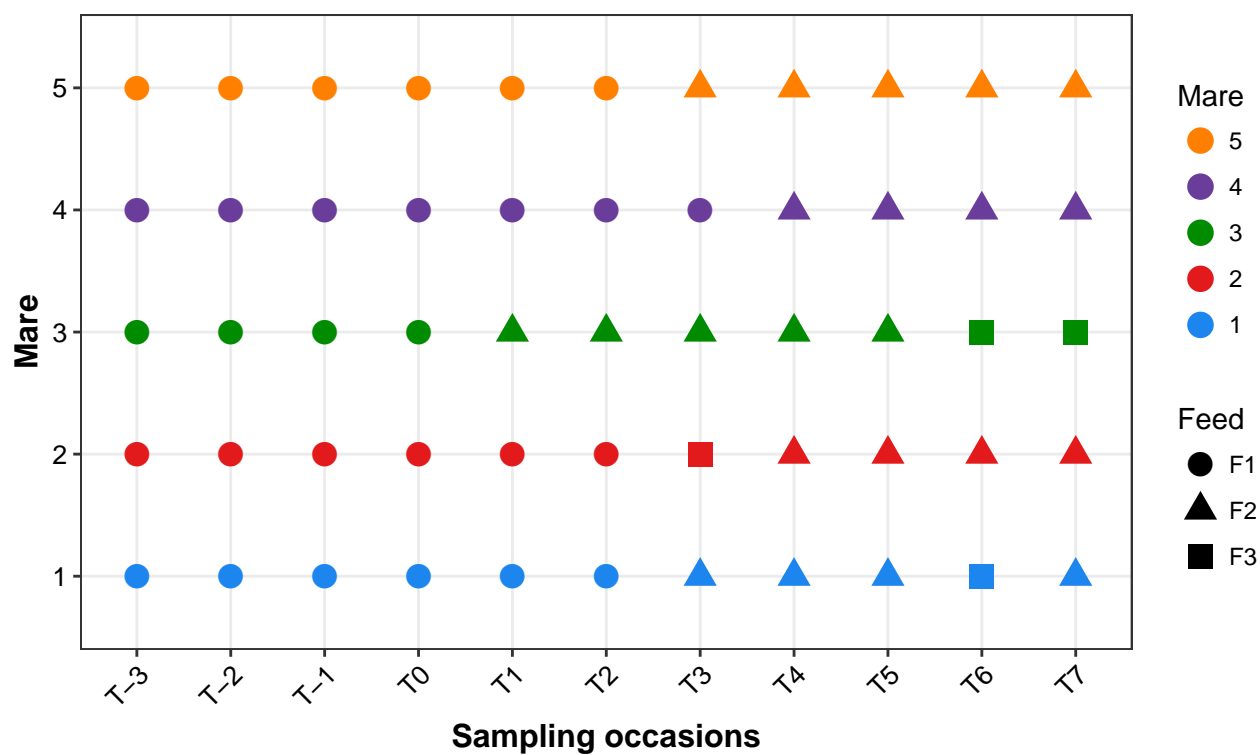

Supplement: Supplemental_Figure_1.pdf [file Supplemental_Figure_1.pdf]
