# Supplementary material for: A longitudinal study of the faecal microbiome and metabolome of periparturient mares
Source: PeerJ journal article supplement (doi:10.7717/peerj.6687), 2019-04-03
Supplement: Supplemental_Figure_3.pdf [file Supplemental_Figure_3.pdf]

log2FoldChange

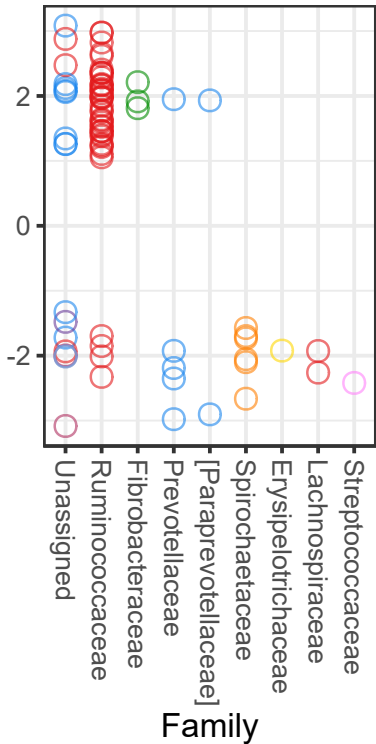

Order

- Bacteroidales
- Clostridiales
- Fibrobacterales
- YS2
- Spirochaetales
- Erysipelotrichales
- Unassigned
- Bacillales
- Lactobacillales
