# Supplementary material for: A longitudinal study of the faecal microbiome and metabolome of periparturient mares
Source: PeerJ journal article supplement (doi:10.7717/peerj.6687), 2019-04-03

Number of compounds identified

2

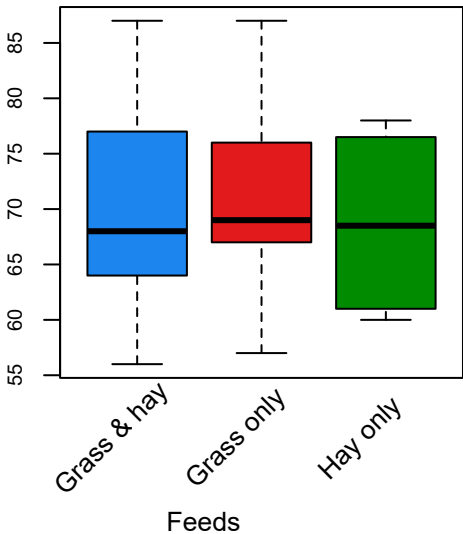

**b**

Number of compounds identified

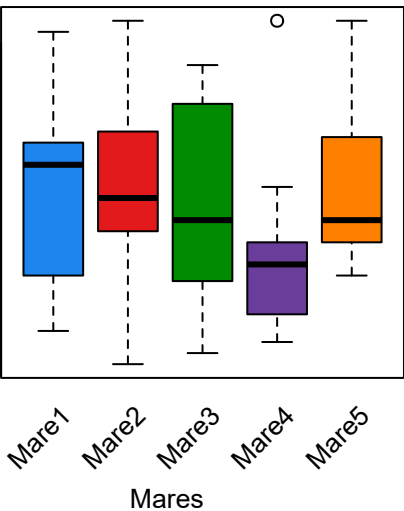

c

Number of compounds identified

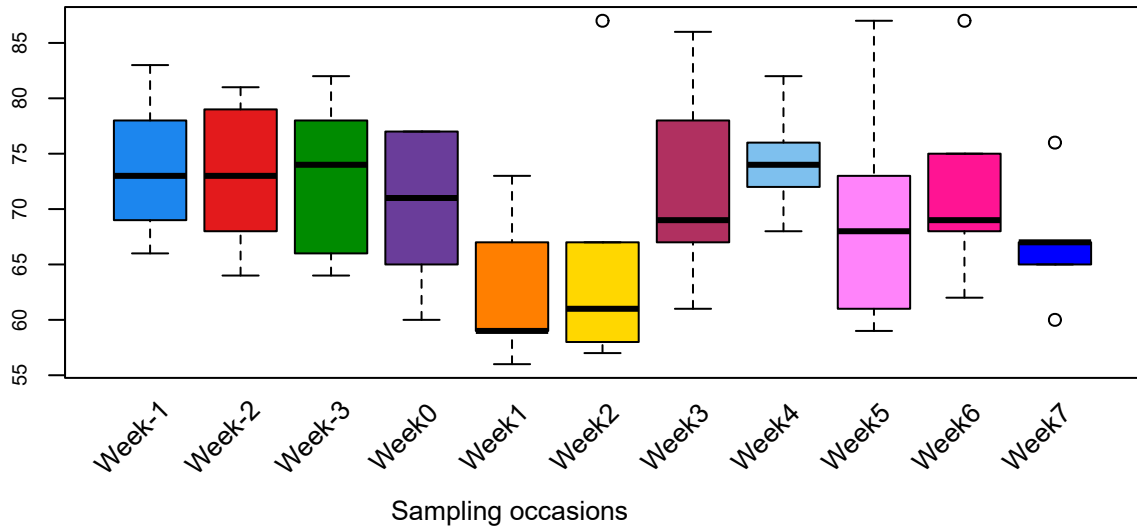

Supplement: Supplemental_Figure_4.pdf [file Supplemental_Figure_4.pdf]
